# Supplementary material for: Optimization of a plasmonic lens structure for maximum optical vortices induced on Weyl semimetal surface states
Source: Royal Society of Chemistry journal article supplement (doi:10.1039/d4na00336e), 2024-01-01
Supplement: d4na00336e1.pdf [file d4na00336e1.pdf]

# Optimization of plasmonic lens structure for maximum optical vortices induced on Weyl Semimetals Surface States

Ritwik Banerjee<sup>1</sup> and Tanmoy Maiti<sup>1†</sup>

<sup>1</sup> Plasmonics and Perovskites Laboratory, Indian Institute of Technology Kanpur, UP, 208016, India

## Supporting information

### S1. Comparison of figure of merit (FOM) between different materials

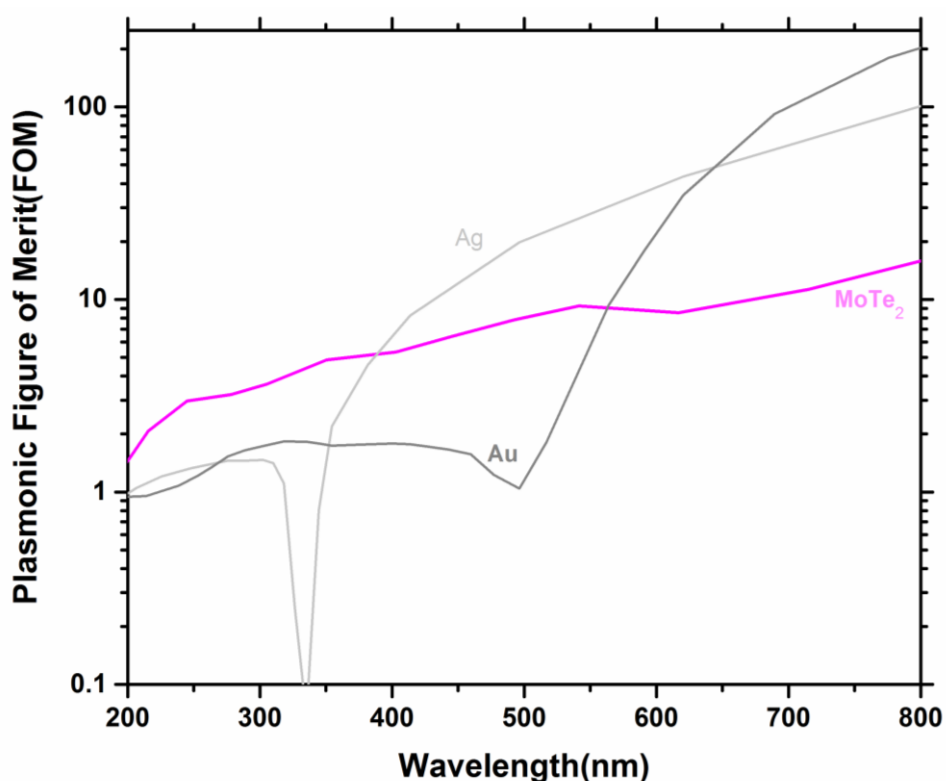

Figure S1: Comparison of figure of merits between MoTe<sub>2</sub> Weyl semimetal, Au and Ag.

Type II Weyl semimetal surface state is prominent in MoTe<sub>2</sub>. [1] The permittivity matrix for Weyl semimetals surface states can be represented as:

<sup>†</sup> Corresponding author Tel: +91-512-259-6599  
Email address: [tmaiti@iitk.ac.in](mailto:tmaiti@iitk.ac.in) (Tanmoy Maiti)

$$\epsilon_{WS} = \begin{pmatrix} \epsilon_{xx} & \epsilon_{xy} & \epsilon_{xz} \\ \epsilon_{xy}^* & \epsilon_{yy} & \epsilon_{yz} \\ \epsilon_{xz}^* & \epsilon_{yz}^* & \epsilon_{zz} \end{pmatrix}$$

Here, off diagonal elements  $\epsilon_{xy}^*$ ,  $\epsilon_{xz}^*$  and  $\epsilon_{yz}^*$  represents the complex conjugate of  $\epsilon_{xy}$ ,  $\epsilon_{xz}$  and  $\epsilon_{yz}$ . The non-zero off-diagonal tensor elements originate from the non-vanishing Berry curvature of the Weyl semimetals.

## S2. Analytical calculations of Electric field and phase maps under x-polarized and y-polarized illumination for hexagonal lens:

Further let's extend our calculation of electric field for linearly polarized lights. In case of x-polarized light,  $\varphi(\theta') = \theta'$  and  $(\theta') = 0$ .

$$\omega(\phi(\theta'), \theta') = \phi(\theta') = 0.$$

$$A(\phi(\theta')) = A_0 \cos \varphi(\theta') = A_0 \cos \theta'.$$

Plugging all the values in equation 3 and integrating it to 0 to  $2\pi$ , we get-

$$E_z(\rho, \theta, z)_{\theta' \in [0, 2\pi]} = A_0 e^{-k_a z} \left[ \int_0^{\pi/3} \cos \theta' e^{jk_{spp} \sqrt{\rho^2 + \{r_o \sec(\theta' - \frac{\pi}{6})\}^2 - 2\rho r_o \sec(\theta' - \frac{\pi}{6}) \cos(\theta - \theta')}} + \right.$$

$$\int_{\pi/3}^{2\pi/3} \cos \theta' e^{jk_{spp} \sqrt{\rho^2 + \{r_o \sec(\theta' - \frac{3\pi}{6})\}^2 - 2\rho r_o \sec(\theta' - \frac{3\pi}{6}) \cos(\theta - \theta')}} +$$

$$\int_{2\pi/3}^{\pi} \cos \theta' e^{jk_{spp} \sqrt{\rho^2 + \{r_o \sec(\theta' - \frac{5\pi}{6})\}^2 - 2\rho r_o \sec(\theta' - \frac{5\pi}{6}) \cos(\theta - \theta')}} +$$

$$\left. \int_{\pi}^{4\pi/3} \cos \theta' e^{jk_{spp} \sqrt{\rho^2 + \{r_o \sec(\theta' - \frac{7\pi}{6})\}^2 - 2\rho r_o \sec(\theta' - \frac{7\pi}{6}) \cos(\theta - \theta')}} + \right.$$

$$\begin{aligned}
27 & \int_{4\pi/3}^{5\pi/3} \cos \theta' e^{jk_{spp} \sqrt{\rho^2 + \{r_o \sec(\theta' - \frac{9\pi}{6})\}^2 - 2\rho r_o \sec(\theta' - \frac{9\pi}{6}) \cos(\theta - \theta')}} + \\
28 & \left. \int_{5\pi/3}^{2\pi} \cos \theta' e^{jk_{spp} \sqrt{\rho^2 + \{r_o \sec(\theta' - \frac{11\pi}{6})\}^2 - 2\rho r_o \sec(\theta' - \frac{11\pi}{6}) \cos(\theta - \theta')}} \right] d\theta' \dots (S1)
\end{aligned}$$

29 For y-polarised light,  $\varphi(\theta') = \frac{\pi}{2} - \theta'$  and  $(\theta') = \frac{\pi}{2}$ .

$$30 \quad \omega(\phi(\theta'), \theta') = \phi(\theta') = \pi/2.$$

$$31 \quad A(\phi(\theta')) = A_0 \cos \varphi(\theta') = A_0 \cos(\frac{\pi}{2} - \theta') = A_0 \sin \theta'.$$

32 Calculating electric field in z-direction for y-polarized light, we get-

$$\begin{aligned}
33 \quad E_z(\rho, \theta, z)_{\theta' \in [0, 2\pi]} \\
34 \quad = A_0 e^{-k_a z} \left[ \int_0^{\pi/3} \sin \theta' e^{jk_{spp} \sqrt{\rho^2 + \{r_o \sec(\theta' - \frac{\pi}{6})\}^2 - 2\rho r_o \sec(\theta' - \frac{\pi}{6}) \cos(\theta - \theta')}} \right. \\
35 \quad + \int_{\pi/3}^{2\pi/3} \sin \theta' e^{jk_{spp} \sqrt{\rho^2 + \{r_o \sec(\theta' - \frac{3\pi}{6})\}^2 - 2\rho r_o \sec(\theta' - \frac{3\pi}{6}) \cos(\theta - \theta')}} \\
36 \quad + \int_{2\pi/3}^{\pi} \sin \theta' e^{jk_{spp} \sqrt{\rho^2 + \{r_o \sec(\theta' - \frac{5\pi}{6})\}^2 - 2\rho r_o \sec(\theta' - \frac{5\pi}{6}) \cos(\theta - \theta')}} \\
37 \quad + \int_{\pi}^{4\pi/3} \sin \theta' e^{jk_{spp} \sqrt{\rho^2 + \{r_o \sec(\theta' - \frac{7\pi}{6})\}^2 - 2\rho r_o \sec(\theta' - \frac{7\pi}{6}) \cos(\theta - \theta')}} \\
38 \quad + \int_{4\pi/3}^{5\pi/3} \sin \theta' e^{jk_{spp} \sqrt{\rho^2 + \{r_o \sec(\theta' - \frac{9\pi}{6})\}^2 - 2\rho r_o \sec(\theta' - \frac{9\pi}{6}) \cos(\theta - \theta')}} \\
39 \quad \left. + \int_{5\pi/3}^{2\pi} \sin \theta' e^{jk_{spp} \sqrt{\rho^2 + \{r_o \sec(\theta' - \frac{11\pi}{6})\}^2 - 2\rho r_o \sec(\theta' - \frac{11\pi}{6}) \cos(\theta - \theta')}} \right] d\theta' \dots (S2)
\end{aligned}$$

40  $e^{-j\theta'}$  can be written as  $(\cos \theta' - j \sin \theta')$ . Therefore, equation 9 in the main manuscript,  
 41 electric field intensity for hexagonal lens, under RCP illumination can also be written as-

42  $E_z(\rho, \theta, z)_{\theta' \in [0, 2\pi]} =$

43  $A_o e^{-k_a z} \left[ \int_0^{\pi/3} \cos \theta' e^{jk_{spp} \sqrt{\rho^2 + \{r_o \sec(\theta' - \frac{\pi}{6})\}^2 - 2\rho r_o \sec(\theta' - \frac{\pi}{6}) \cos(\theta - \theta')}} + \right.$

44  $\int_{\pi/3}^{2\pi/3} \cos \theta' e^{jk_{spp} \sqrt{\rho^2 + \{r_o \sec(\theta' - \frac{3\pi}{6})\}^2 - 2\rho r_o \sec(\theta' - \frac{3\pi}{6}) \cos(\theta - \theta')}} +$

45  $\int_{2\pi/3}^{\pi} \cos \theta' e^{jk_{spp} \sqrt{\rho^2 + \{r_o \sec(\theta' - \frac{5\pi}{6})\}^2 - 2\rho r_o \sec(\theta' - \frac{5\pi}{6}) \cos(\theta - \theta')}} +$

46  $\int_{\pi}^{4\pi/3} \cos \theta' e^{jk_{spp} \sqrt{\rho^2 + \{r_o \sec(\theta' - \frac{7\pi}{6})\}^2 - 2\rho r_o \sec(\theta' - \frac{7\pi}{6}) \cos(\theta - \theta')}} +$

47  $\int_{4\pi/3}^{5\pi/3} \cos \theta' e^{jk_{spp} \sqrt{\rho^2 + \{r_o \sec(\theta' - \frac{9\pi}{6})\}^2 - 2\rho r_o \sec(\theta' - \frac{9\pi}{6}) \cos(\theta - \theta')}} +$

48  $\int_{5\pi/3}^{2\pi} \cos \theta' e^{jk_{spp} \sqrt{\rho^2 + \{r_o \sec(\theta' - \frac{11\pi}{6})\}^2 - 2\rho r_o \sec(\theta' - \frac{11\pi}{6}) \cos(\theta - \theta')}} \left. \right] -$

49  $j \left[ \int_0^{\pi/3} \sin \theta' e^{jk_{spp} \sqrt{\rho^2 + \{r_o \sec(\theta' - \frac{\pi}{6})\}^2 - 2\rho r_o \sec(\theta' - \frac{\pi}{6}) \cos(\theta - \theta')}} + \right.$

50  $\int_{\pi/3}^{2\pi/3} \sin \theta' e^{jk_{spp} \sqrt{\rho^2 + \{r_o \sec(\theta' - \frac{3\pi}{6})\}^2 - 2\rho r_o \sec(\theta' - \frac{3\pi}{6}) \cos(\theta - \theta')}} +$

51  $\int_{2\pi/3}^{\pi} \sin \theta' e^{jk_{spp} \sqrt{\rho^2 + \{r_o \sec(\theta' - \frac{5\pi}{6})\}^2 - 2\rho r_o \sec(\theta' - \frac{5\pi}{6}) \cos(\theta - \theta')}} +$

$$\begin{aligned}
52 & \int_{\pi}^{4\pi/3} \sin\theta' e^{jk_{spp}} \sqrt{\rho^2 + \{r_o \sec(\theta' - \frac{7\pi}{6})\}^2 - 2\rho r_o \sec(\theta' - \frac{7\pi}{6}) \cos(\theta - \theta')} + \\
53 & \int_{4\pi/3}^{5\pi/3} \sin\theta' e^{jk_{spp}} \sqrt{\rho^2 + \{r_o \sec(\theta' - \frac{9\pi}{6})\}^2 - 2\rho r_o \sec(\theta' - \frac{9\pi}{6}) \cos(\theta - \theta')} + \\
54 & \left. \int_{5\pi/3}^{2\pi} \sin\theta' e^{jk_{spp}} \sqrt{\rho^2 + \{r_o \sec(\theta' - \frac{11\pi}{6})\}^2 - 2\rho r_o \sec(\theta' - \frac{11\pi}{6}) \cos(\theta - \theta')} \right\} d\theta' \dots (S3)
\end{aligned}$$

55 So, for hexagonal lens structures electric field under RCP polarization ( $E_z(\rho, \theta, z)_{RCP}$ ) will  
56 be a combination of electric field due to x-polarized light ( $E_z(\rho, \theta, z)_{x-p}$ ) and y polarized  
57 light ( $E_z(\rho, \theta, z)_{y-p}$ ) and can be written as,  $E_z(\rho, \theta, z)_{RCP} = E_z(\rho, \theta, z)_{x-p} -$   
58  $j E_z(\rho, \theta, z)_{y-p}$ . Similarly electric field under LCP,  $E_z(\rho, \theta, z)_{LCP} = E_z(\rho, \theta, z)_{x-p} +$   
59  $j E_z(\rho, \theta, z)_{y-p}$ .

### 60 **S3. Analytical calculations for heptagonal lens under circular polarization:**

61 For non-symmetric Heptagonal plasmonic lens, the electric field for LCP similarly can be  
62 derived as follows-

$$\begin{aligned}
63 & [E_z(\rho, \theta, z)_{\theta' \in [0, 2\pi]}]_{LCP} = \\
64 & A_o e^{-k_a z} \left[ \int_0^{2\pi/7} e^{j\theta'} e^{jk_{spp}} \sqrt{\rho^2 + \{r_o \sec(\theta' - \frac{\pi}{7})\}^2 - 2\rho r_o \sec(\theta' - \frac{\pi}{7}) \cos(\theta - \theta')} + \right. \\
65 & \int_{2\pi/7}^{4\pi/7} e^{j\theta'} e^{jk_{spp}} \sqrt{\rho^2 + \{r_o \sec(\theta' - \frac{3\pi}{7})\}^2 - 2\rho r_o \sec(\theta' - \frac{3\pi}{7}) \cos(\theta - \theta')} + \\
66 & \int_{4\pi/7}^{6\pi/7} e^{j\theta'} e^{jk_{spp}} \sqrt{\rho^2 + \{r_o \sec(\theta' - \frac{5\pi}{7})\}^2 - 2\rho r_o \sec(\theta' - \frac{5\pi}{7}) \cos(\theta - \theta')} + \\
67 & \left. \int_{6\pi/7}^{8\pi/7} e^{j\theta'} e^{jk_{spp}} \sqrt{\rho^2 + \{r_o \sec(\theta' - \frac{7\pi}{7})\}^2 - 2\rho r_o \sec(\theta' - \frac{7\pi}{7}) \cos(\theta - \theta')} + \right.
\end{aligned}$$

$$\begin{aligned}
68 & \int_{8\pi/7}^{10\pi/7} e^{j\theta'} e^{jk_{spp}\sqrt{\rho^2+\{r_o \sec(\theta'-\frac{9\pi}{7})\}^2-2\rho r_o \sec(\theta'-\frac{9\pi}{7})\cos(\theta-\theta')}} + \\
69 & \int_{10\pi/7}^{12\pi/7} e^{j\theta'} e^{jk_{spp}\sqrt{\rho^2+\{r_o \sec(\theta'-\frac{11\pi}{7})\}^2-2\rho r_o \sec(\theta'-\frac{11\pi}{7})\cos(\theta-\theta')}} + \\
70 & \int_{12\pi/7}^{2\pi} e^{j\theta'} e^{jk_{spp}\sqrt{\rho^2+\{r_o \sec(\theta'-\frac{13\pi}{7})\}^2-2\rho r_o \sec(\theta'-\frac{13\pi}{7})\cos(\theta-\theta')}} \left. \right] d\theta' \dots (S4)
\end{aligned}$$

#### 71 **S4. Analytical calculations for octagonal lens under circular polarization:**

72 From equation 10 derived in the main manuscript, Electric field under RCP polarisation for  
73 octagonal plasmonic lens can also be written as-

$$\begin{aligned}
74 & E_z(\rho, \theta, z)_{\theta' \in [0, 2\pi]} = A_o e^{-k_a z} \left[ \int_0^{\pi/4} e^{-j\theta'} e^{jk_{spp}\sqrt{\rho^2+\{r_o \sec(\theta'-\frac{\pi}{8})\}^2-2\rho r_o \sec(\theta'-\frac{\pi}{8})\cos(\theta-\theta')}} + \right. \\
75 & \int_{\pi/4}^{\pi/2} e^{-j\theta'} e^{jk_{spp}\sqrt{\rho^2+\{r_o \sec(\theta'-\frac{3\pi}{8})\}^2-2\rho r_o \sec(\theta'-\frac{3\pi}{8})\cos(\theta-\theta')}} + \\
76 & \int_{\pi/2}^{3\pi/4} e^{-j\theta'} e^{jk_{spp}\sqrt{\rho^2+\{r_o \sec(\theta'-\frac{5\pi}{8})\}^2-2\rho r_o \sec(\theta'-\frac{5\pi}{8})\cos(\theta-\theta')}} + \\
77 & \int_{3\pi/4}^{\pi} e^{-j\theta'} e^{jk_{spp}\sqrt{\rho^2+\{r_o \sec(\theta'-\frac{7\pi}{8})\}^2-2\rho r_o \sec(\theta'-\frac{7\pi}{8})\cos(\theta-\theta')}} + \\
78 & \int_{\pi}^{5\pi/4} e^{-j\theta'} e^{jk_{spp}\sqrt{\rho^2+\{r_o \sec(\theta'-\frac{9\pi}{8})\}^2-2\rho r_o \sec(\theta'-\frac{9\pi}{8})\cos(\theta-\theta')}} + \\
79 & \left. \int_{5\pi/4}^{3\pi/2} e^{-j\theta'} e^{jk_{spp}\sqrt{\rho^2+\{r_o \sec(\theta'-\frac{11\pi}{8})\}^2-2\rho r_o \sec(\theta'-\frac{11\pi}{8})\cos(\theta-\theta')}} + \right]
\end{aligned}$$

$$\begin{aligned}
80 & \int_{3\pi/2}^{7\pi/4} e^{-j\theta'} e^{jk_{spp}} \sqrt{\rho^2 + \{r_o \sec(\theta' - \frac{13\pi}{8})\}^2 - 2\rho r_o \sec(\theta' - \frac{13\pi}{8}) \cos(\theta - \theta')} + \\
81 & \int_{7\pi/4}^{2\pi} e^{-j\theta'} e^{jk_{spp}} \sqrt{\rho^2 + \{r_o \sec(\theta' - \frac{15\pi}{8})\}^2 - 2\rho r_o \sec(\theta' - \frac{15\pi}{8}) \cos(\theta - \theta')} \left. d\theta' \dots (S5) \right]
\end{aligned}$$

82 Similarly for octagonal lens, Electric field due to LCP can be found out as-

$$\begin{aligned}
83 & E_z(\rho, \theta, z)_{\theta' \in [0, 2\pi]} = A_o e^{-k_a z} \left[ \int_0^{\pi/4} e^{j\theta'} e^{jk_{spp}} \sqrt{\rho^2 + \{r_o \sec(\theta' - \frac{\pi}{8})\}^2 - 2\rho r_o \sec(\theta' - \frac{\pi}{8}) \cos(\theta - \theta')} + \right. \\
84 & \int_{\pi/4}^{\pi/2} e^{j\theta'} e^{jk_{spp}} \sqrt{\rho^2 + \{r_o \sec(\theta' - \frac{3\pi}{8})\}^2 - 2\rho r_o \sec(\theta' - \frac{3\pi}{8}) \cos(\theta - \theta')} + \\
85 & \int_{\pi/2}^{3\pi/4} e^{j\theta'} e^{jk_{spp}} \sqrt{\rho^2 + \{r_o \sec(\theta' - \frac{5\pi}{8})\}^2 - 2\rho r_o \sec(\theta' - \frac{5\pi}{8}) \cos(\theta - \theta')} + \\
86 & \int_{3\pi/4}^{\pi} e^{j\theta'} e^{jk_{spp}} \sqrt{\rho^2 + \{r_o \sec(\theta' - \frac{7\pi}{8})\}^2 - 2\rho r_o \sec(\theta' - \frac{7\pi}{8}) \cos(\theta - \theta')} + \\
87 & \int_{\pi}^{5\pi/4} e^{j\theta'} e^{jk_{spp}} \sqrt{\rho^2 + \{r_o \sec(\theta' - \frac{9\pi}{8})\}^2 - 2\rho r_o \sec(\theta' - \frac{9\pi}{8}) \cos(\theta - \theta')} + \\
88 & \int_{5\pi/4}^{3\pi/2} e^{j\theta'} e^{jk_{spp}} \sqrt{\rho^2 + \{r_o \sec(\theta' - \frac{11\pi}{8})\}^2 - 2\rho r_o \sec(\theta' - \frac{11\pi}{8}) \cos(\theta - \theta')} + \\
89 & \int_{3\pi/2}^{7\pi/4} e^{j\theta'} e^{jk_{spp}} \sqrt{\rho^2 + \{r_o \sec(\theta' - \frac{13\pi}{8})\}^2 - 2\rho r_o \sec(\theta' - \frac{13\pi}{8}) \cos(\theta - \theta')} + \\
90 & \left. \int_{7\pi/4}^{2\pi} e^{j\theta'} e^{jk_{spp}} \sqrt{\rho^2 + \{r_o \sec(\theta' - \frac{15\pi}{8})\}^2 - 2\rho r_o \sec(\theta' - \frac{15\pi}{8}) \cos(\theta - \theta')} \right] d\theta' \dots (S6)
\end{aligned}$$

91 **S5. Generalized equation of electric field for polygonal lens with sides p**  
 92 **under linear polarisation (x-P and y-P):**

93  $[E_z(\rho, \theta, z)_{\theta' \in [0, 2\pi]}]_{Polygonal, xP}$

$$94 = \sum_{n=1}^p A_o e^{-k_a z} \int_{\frac{2(n-1)\pi}{p}}^{\frac{2n\pi}{p}} \cos\theta e^{jk_{spp}} \sqrt{\rho^2 + \left\{r_o \sec\left(\theta' - \frac{(2n-1)\pi}{p}\right) - 2\rho r_o \sec\left\{\theta' - \frac{(2n-1)\pi}{p}\right\} \cos(\theta - \theta')}\right.} d\theta' \dots (S7)$$

95  $[E_z(\rho, \theta, z)_{\theta' \in [0, 2\pi]}]_{Polygonal, yP}$

$$96 = \sum_{n=1}^p A_o e^{-k_a z} \int_{\frac{2(n-1)\pi}{p}}^{\frac{2n\pi}{p}} \sin\theta e^{jk_{spp}} \sqrt{\rho^2 + \left\{r_o \sec\left(\theta' - \frac{(2n-1)\pi}{p}\right) - 2\rho r_o \sec\left\{\theta' - \frac{(2n-1)\pi}{p}\right\} \cos(\theta - \theta')}\right.} d\theta' \dots (S8)$$

97 **S6. MATLAB and FDTD plots of Electric field and phase of different**  
 98 **plasmonic lens structure under LCP:**



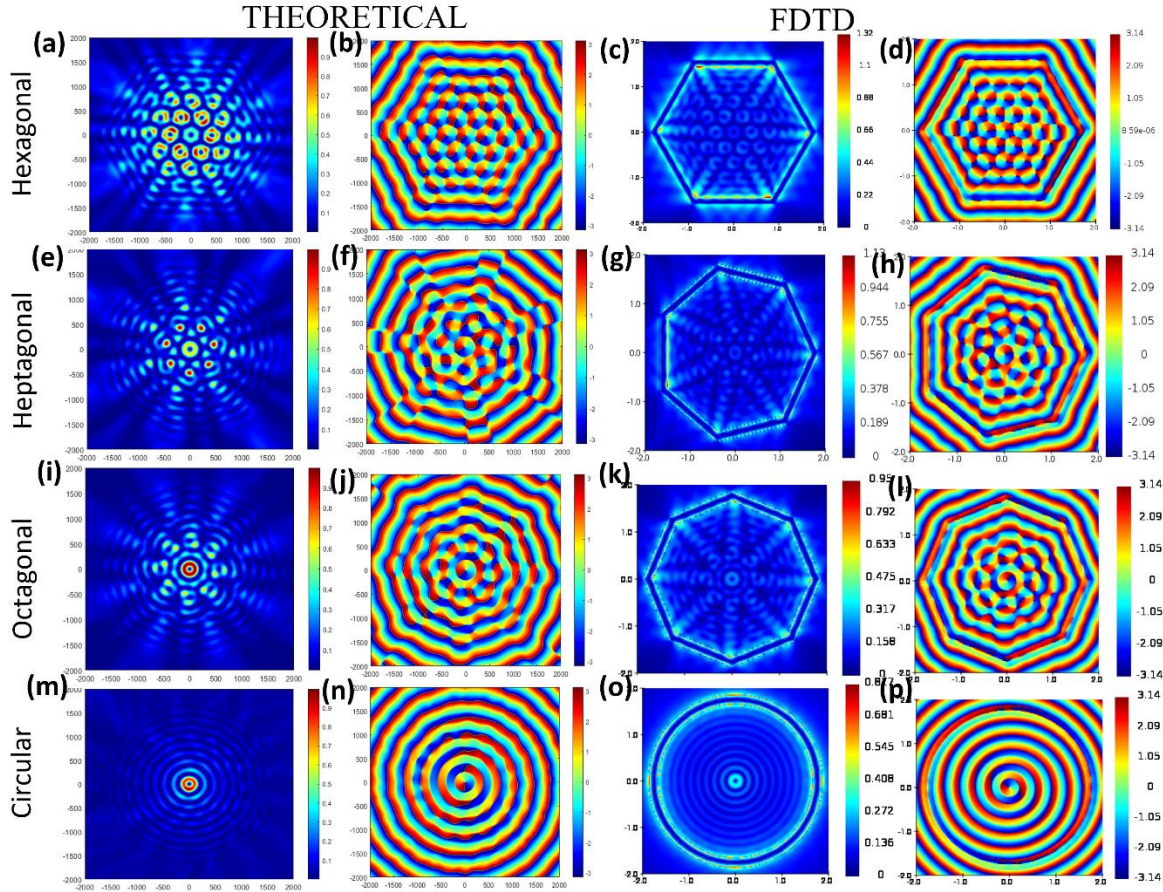

99

100 *Figure S2. MATLAB plots and FDTD simulations of intensity and phase distribution of*  
 101 *different lens structure, i.e., hexagonal lens (a, b, c, d), heptagonal lens (e, f, g, h), octagonal*  
 102 *lens (i, j, k, l) and circular lens (m, n, o, p) for LCP polarization at 415 nm wavelength.*

103 **S7. Effect of size of lens for linearly polarised illumination in intensity and**  
 104 **phase:**

105 In figure S3 and S4, the effect of linearly polarised lights on hexagonal lens has been shown  
 106 through FDTD simulations and MATLAB plots. No bright spots have been obtained at the  
 107 centre of the hexagonal lens for both x-polarised and y-polarised illuminations. A “scaling

108 behaviour” is also obtained in figure S3 and S4 for both x-polarised and y-polarised light.

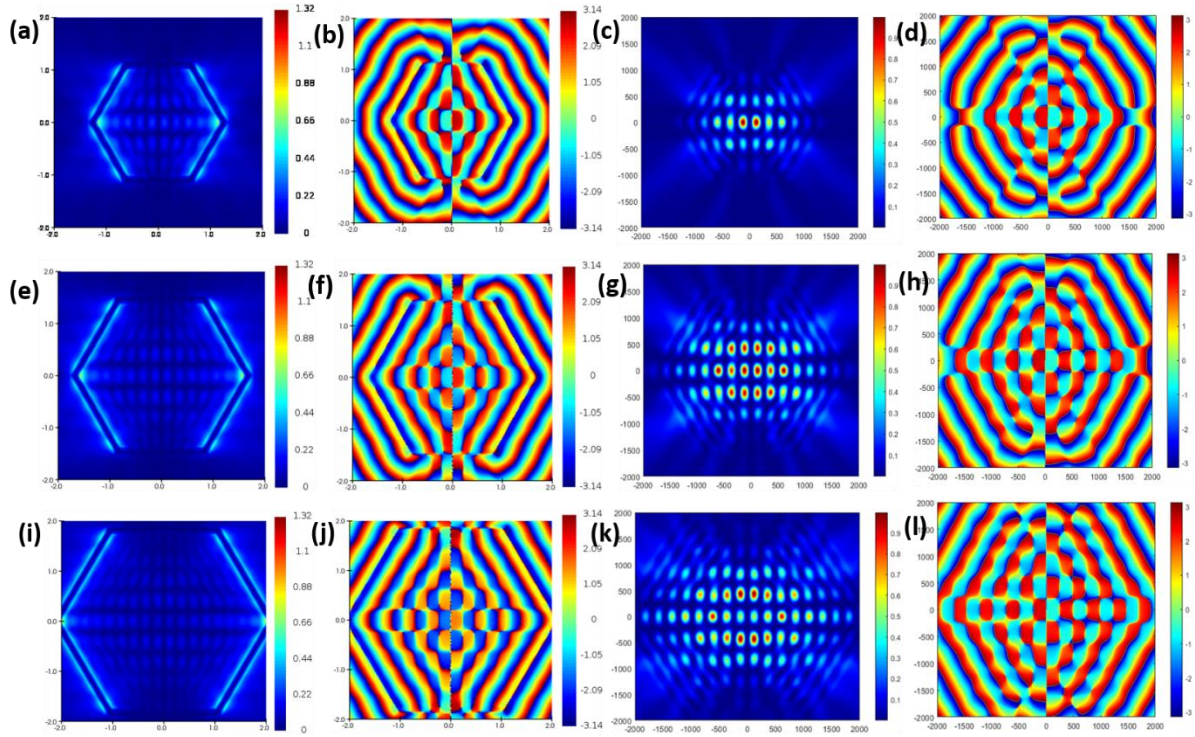

109

110 *Figure.S3. Intensity and phase distribution of Hexagonal lens in FDTD simulation and in*  
 111 *MATLAB for  $r_0 = 3 \lambda_{spp}$  (a, b, c, d),  $4 \lambda_{spp}$  (e, f, g, h) and  $5 \lambda_{spp}$  (i, j, k, l) for x-polarized*  
 112 *illumination.*

113

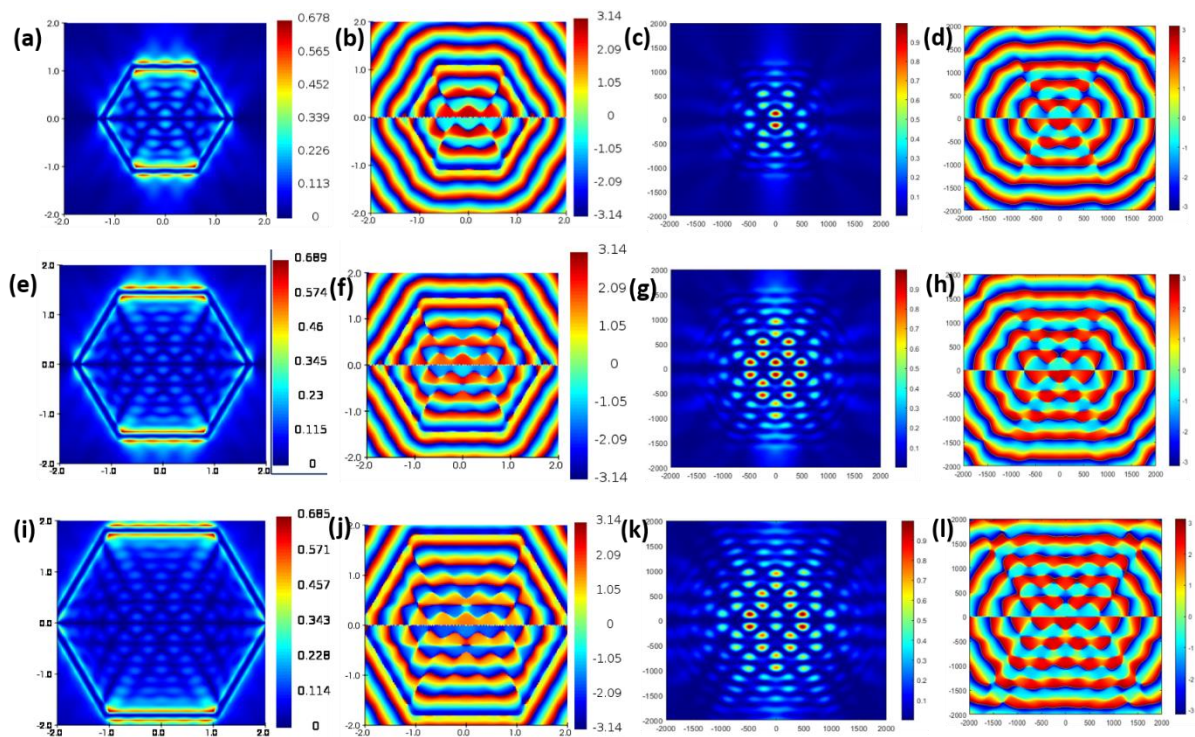

114

115 *Figure.S4. Intensity and phase distribution of Hexagonal lens in FDTD simulation and in*  
 116 *MATLAB for  $r_0 = 3 \lambda_{spp}$  (a, b, c, d),  $4 \lambda_{spp}$  (e, f, g, h) and  $5 \lambda_{spp}$  (i, j, k, l) for y-polarized*  
 117 *illumination.*

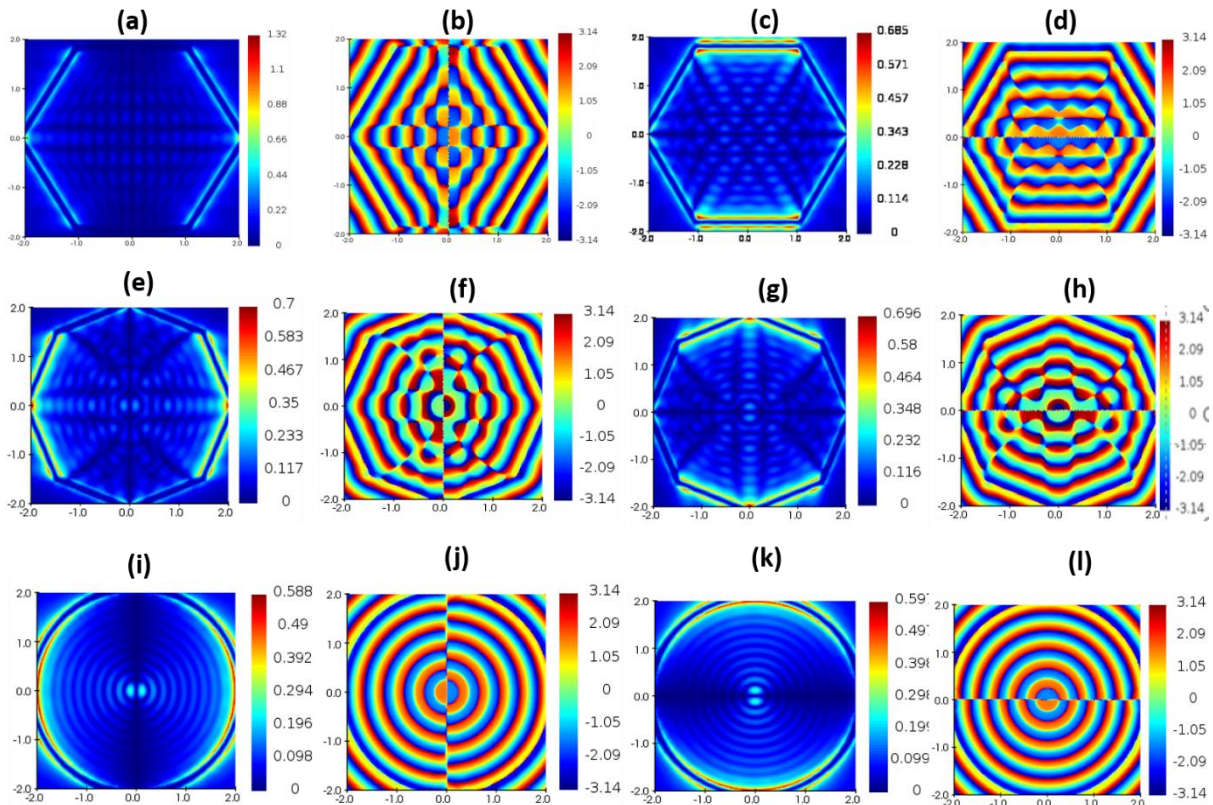

118  
 119 *Figure.S5. Intensity and phase distribution of hexagonal lens(a, b, c, d), octagonal lens (e, f,*  
 120 *g, h) and circular lens (i, j, k, l) in FDTD simulation for x-polarized(1<sup>st</sup> 2<sup>nd</sup> column) and y-*  
 121 *polarized (3<sup>rd</sup> and 4<sup>th</sup> column) for radius= $5 \lambda_{spp}$  and illumination wavelength 415 nm in*  
 122 *FDTD simulation.*

## 123 **S8. Design features and far-field plots of hexagonal lens:**

124 Far-field studies and design features of best performing plasmonic lens structure has been  
 125 shown in figure S6. Polarized light is being impinged perpendicularly from the below (the  
 126 glass side). After generating plasmons in the 2-d surface, the waves get focused at the far-  
 127 field at focal point at approximately  $0.36 \mu\text{m}$ .<sup>1, 2</sup> The focal point has been determined by far-  
 128 field super focusing equations.<sup>2</sup> The design parameters of hexagonal lens has been shown  
 129 schematically in figure S6.

Far field intensity and phase at focal point,  $z=0.36 \mu\text{m}$

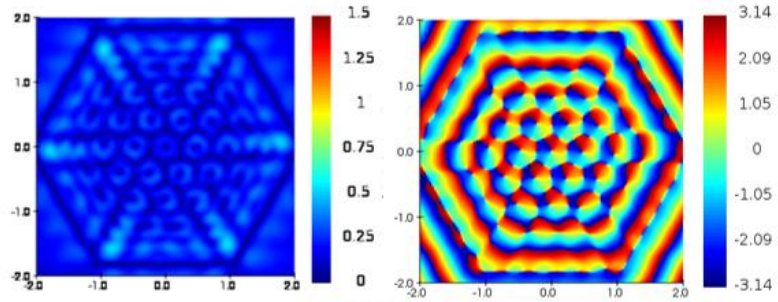

Focal point  
 $z=0.36 \mu\text{m}$

Radius of the lens ( $r_0$ ) =  $n \lambda_{\text{SPP}}$ ,  
where  $n$  represents integers and  
 $\lambda_{\text{SPP}}$  is SPP wavelength

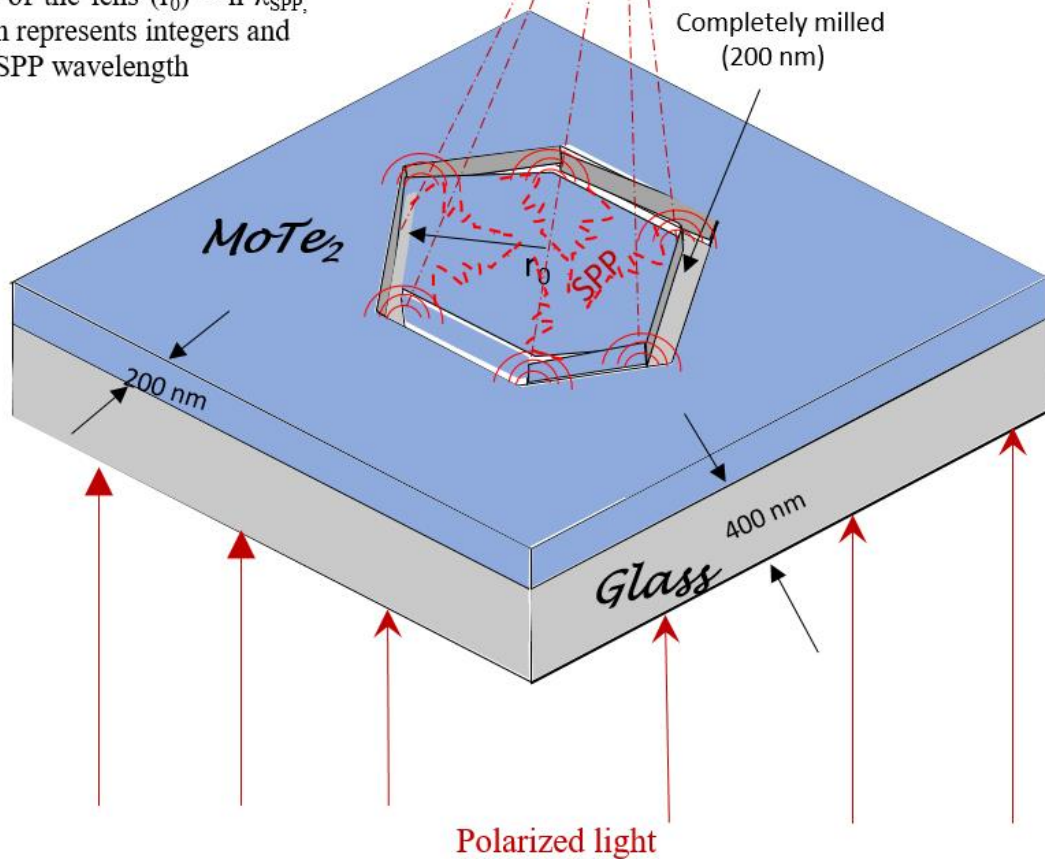

130

131 *Figure S6: Design features and far field studies of hexagonal plasmonic lens*

132

133 **S9. Investigation of the reasons behind the optical singularities of different**  
134 **plasmonic structures and the algorithm behind the MATLAB plots:**

135 The electrical field equation for polygonal lens structure having number of sides  $p$ , has been  
136 derived in the manuscript, as:

137  $[E_z(\rho, \theta, z)_{\theta' \in [0, 2\pi]}]_{\text{Polygonal, RCP}}$

138  $= \sum_{n=1}^p A_o e^{-k_a z} \int_{\frac{2(n-1)\pi}{p}}^{\frac{2n\pi}{p}} e^{-j\theta'} e^{jk_{spp}} \sqrt{\rho^2 + \{r_o \sec(\theta' - \frac{(2n-1)\pi}{p})\}^2 - 2\rho r_o \sec\{\theta' - \frac{(2n-1)\pi}{p}\} \cos(\theta - \theta') } d\theta' \dots (S9),$

139 The equation has been written in a more expanded form.

140  $= A_o e^{-k_a z} \left[ \int_0^{\frac{2\pi}{p}} e^{-j(\theta' - k_{spp} \sqrt{\rho^2 + \{r_o \sec(\theta' - \frac{\pi}{p})\}^2 - 2\rho r_o \sec\{\theta' - \frac{\pi}{p}\} \cos(\theta - \theta')}) + \right.$

141  $\int_{\frac{2\pi}{p}}^{\frac{4\pi}{p}} e^{-j(\theta' - k_{spp} \sqrt{\rho^2 + \{r_o \sec(\theta' - \frac{3\pi}{p})\}^2 - 2\rho r_o \sec\{\theta' - \frac{3\pi}{p}\} \cos(\theta - \theta')}) +$

142  $\int_{\frac{4\pi}{p}}^{\frac{6\pi}{p}} e^{-j(\theta' - k_{spp} \sqrt{\rho^2 + \{r_o \sec(\theta' - \frac{5\pi}{p})\}^2 - 2\rho r_o \sec\{\theta' - \frac{5\pi}{p}\} \cos(\theta - \theta')}) +$

143  $\dots \dots \dots + \int_{\frac{2(p-1)\pi}{p}}^{2\pi} e^{-j(\theta' - k_{spp} \sqrt{\rho^2 + \{r_o \sec(\theta' - \frac{(2p-1)\pi}{p})\}^2 - 2\rho r_o \sec\{\theta' - \frac{(2p-1)\pi}{p}\} \cos(\theta - \theta')}) \left. \right] d\theta' \dots (S10)$

144 At any certain position inside the lens structure  $\rho$  and  $\theta$  are constant and  $r_o, p$  takes a certain  
 145 value when the particular lens structure is envisioned. Consequently, it is now obvious that  
 146 the value of  $E_z$  at a particular point  $(\rho, \theta)$  is obtained after a single integration by solving  
 147 Equation 9 while holding  $(\rho, \theta)$  constant. We have to conduct this process relentlessly in as  
 148 many points as possible in the output monitor range or on to the range we want to investigate  
 149 to get a clearer image of intensity map. However, we were unable to discover any analytical  
 150 solutions for the definite integral and had to resort to numerical methods, such as, Simpson's  
 151 3/8 rule. The plots agree well with the FDTD simulations.

152  $e^{-j(\theta' + f(\theta'))}$  is replaced as  $\cos(\theta' + f(\theta')) - j \sin(\theta' + f(\theta'))$  in equation S11 and written  
 153 as below:

$$\begin{aligned}
154 \quad [E_z(\rho, \theta, z)_{\theta' \in [0, 2\pi]}]_{Polygonal, RCP} &= A_o e^{-k_a z} \left\{ \int_0^{\frac{2\pi}{p}} \cos(\theta' + f_1(\theta')) - j \sin(\theta' + f_1(\theta')) + \right. \\
155 \quad \int_{\frac{2\pi}{p}}^{\frac{4\pi}{p}} \cos(\theta' + f_2(\theta')) - j \sin(\theta' + f_2(\theta')) + \int_{\frac{4\pi}{p}}^{\frac{6\pi}{p}} \cos(\theta' + f_3(\theta')) - j \sin(\theta' + \\
156 \quad f_3(\theta')) + \dots \dots \dots + \int_{\frac{2(p-1)\pi}{p}}^{2\pi} \cos(\theta' + f_p(\theta')) - j \sin(\theta' + p(\theta')) \left. \right\} d\theta' \quad (S11)
\end{aligned}$$

157 Let's say after integration, the cosine functions produce the values  $C_1, C_2, C_3, \dots$  etc. and the  
158 sine functions  $S_1, S_2$  and  $S_3$  for any particular  $p$ .

159 According to the definition, in the co-ordinates of optical singularity points, both the real part  
160 and imaginary part of the electric field of the wave are zero turning the phase at those  
161 singular points undefined. Mathematically it can be expressed as,

$$162 \quad \text{Phase (Z)}_{\text{singularity points}} = \tan^{-1} \left[ -\frac{S_1 + S_2 + S_3 + \dots + S_p}{C_1 + C_2 + C_3 + \dots + C_p} \right] = \text{undefined}.$$

163 For any structure at  $(\rho, \theta = 0)$ ,  $S_1 + S_2 + S_3 + \dots + S_p = 0$  and  $C_1 + C_2 + C_3 + \dots + C_p = 0$ .

164 For hexagonal lens, at  $(\rho, \theta = \pm \lambda_{spp}, \pm \frac{\pi}{3}$  and  $0)$  singularity points are obtained for LCP.

165 When the radius of the lens is increased, singularity points are obtained at  $\rho = n\lambda_{spp}$ . For  
166 RCP also, singularities are obtained at only those coordinates only. At those coordinates,  
167 electric field at  $z$  direction  $(E_z) = 0$ .

168 For, circular lens,  $E_z = 0$  occurs only at  $\rho, \theta = 0, 0$ .

169

170

171

## 172 **References:**

173 S1. J. Miao, Y. Wang, C. Guo, Y. Tian, J. Zhang, Q. Liu, Z. Zhou and H. Misawa, *Plasmonics*, 2012,  
174 **7**, 377-381.

175 S2. Y. Liu, H. Xu, F. Stief, N. Zhitenev and M. Yu, *Optics express*, 2011, **19**, 20233-20243.

176
